# Supplementary material for: CXXC finger protein 1-mediated histone H3 lysine-4 trimethylation is essential for proper meiotic crossover formation in mice
Source: Oxford University Press journal article supplement (doi:10.1242/dev.183764), 2020-02-24
Supplement: dev183764supp.pdf [file dev183764supp.pdf]

Figure S1

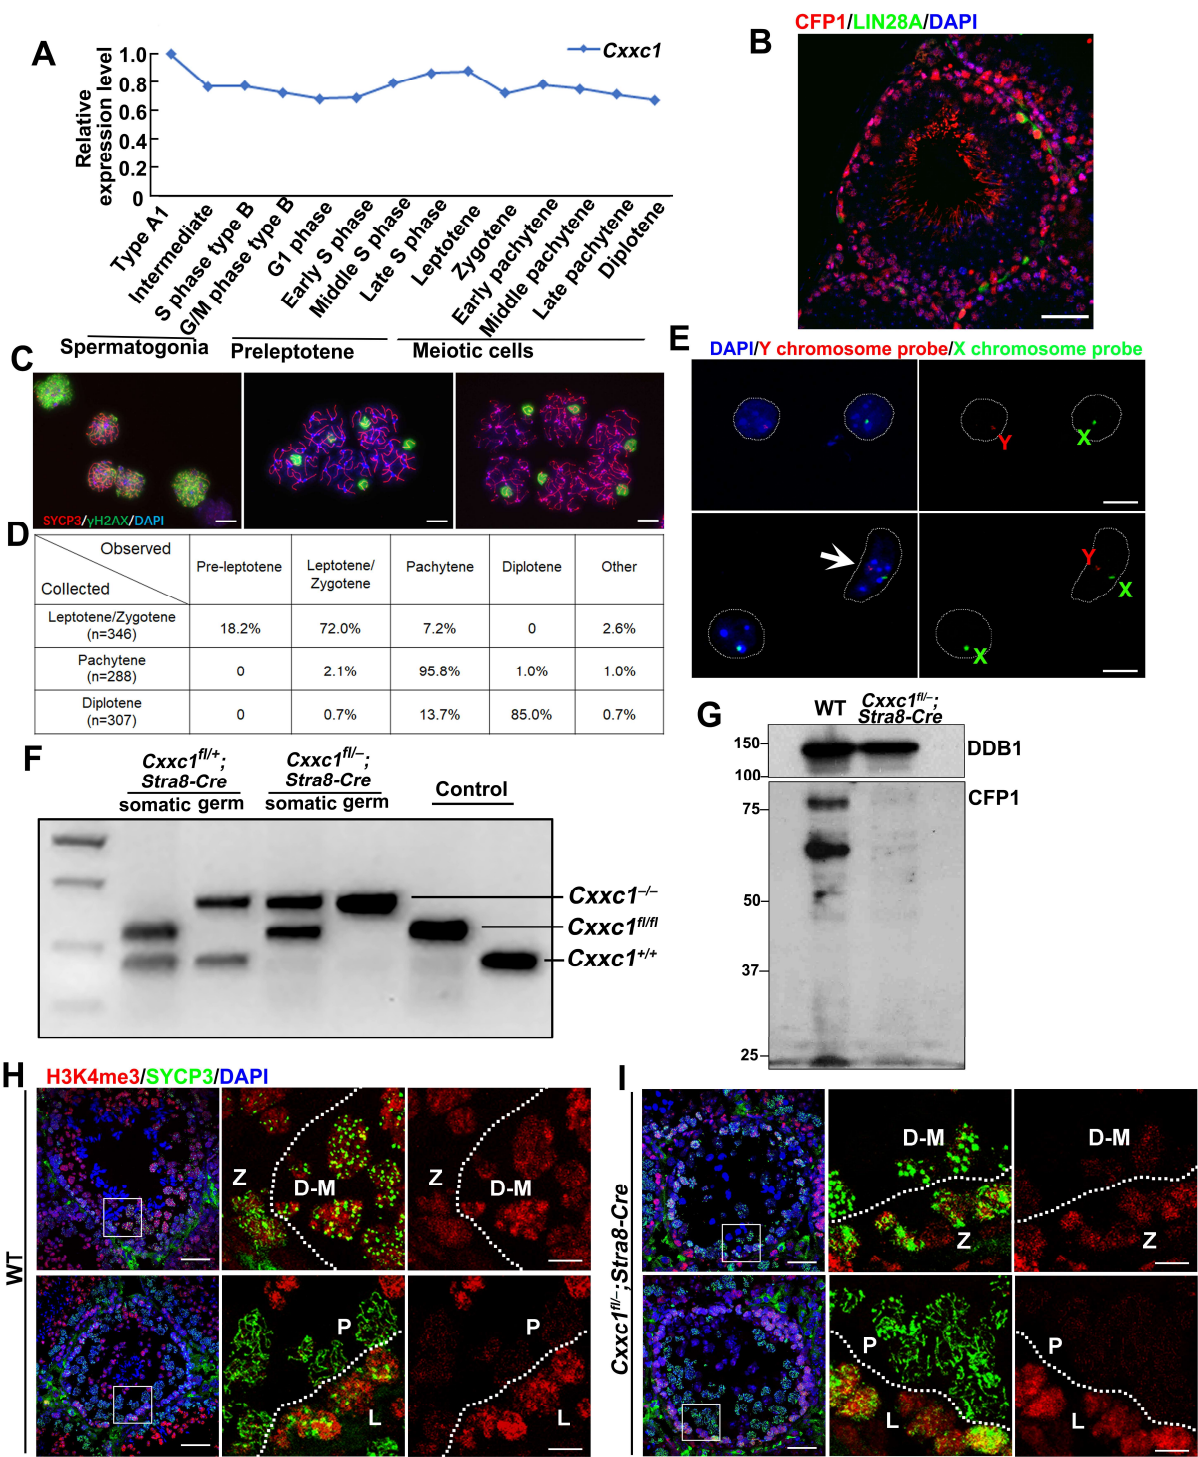

**Figure S1. CFP1 is indispensable for H3K4me3 maintenance during spermatogenesis.**

**A:** Relative expression level of *Cxxc1* from spermatogonia to meiotic cells from published single-cell RNA-seq dataset (Chen et al., 2018). **B:** Immunofluorescent co-staining of LIN28A and CFP1 in testes of 12-week-old WT mice. DNA was counterstained with DAPI. Scale bar = 50  $\mu$ M. **C:** Representative images showed the sorted Leptotene/Zygotene (L/Z), Pachytene (P) and Diplotene (D) spermatocytes. The spread nuclei were double labeled with  $\gamma$ H2AX (green) and SYCP3 (red) and co-stained with DAPI (blue). Scale bars = 20  $\mu$ m. **D:** Percent purity quantification based on immunofluorescence analysis after cell sorting. Cell purity was calculated as (cell type observed/total cells)  $\times$  100%. **E:** Representative images of FISH assay of X and Y chromosome on FACS-isolated diploid cells. The white arrow indicated a somatic cell with both X and Y chromosome and the others were secondary spermatocytes with either X or Y chromosome. Scale bars = 20  $\mu$ m. **F:** Genotyping of somatic cells and Cre-mediated recombined germ cells in heterozygous and knockout mice. **G:** Western blot using an antibody targeting CFP1 N-terminal region in spermatogenic cells isolated from adult WT and *Cxxc1*<sup>fl/-</sup>; *Stra8-Cre* mice. **H and I:** Left tri-color panel, Immunofluorescent co-staining of SYCP3 and H3K4me3 in testes of 12-week-old WT and *Cxxc1*<sup>fl/-</sup>; *Stra8-Cre* mice. DNA was counterstained with DAPI. Scale bar = 50  $\mu$ M. Right two panels are enlarged images. Scale bar = 200  $\mu$ M.

Figure S2

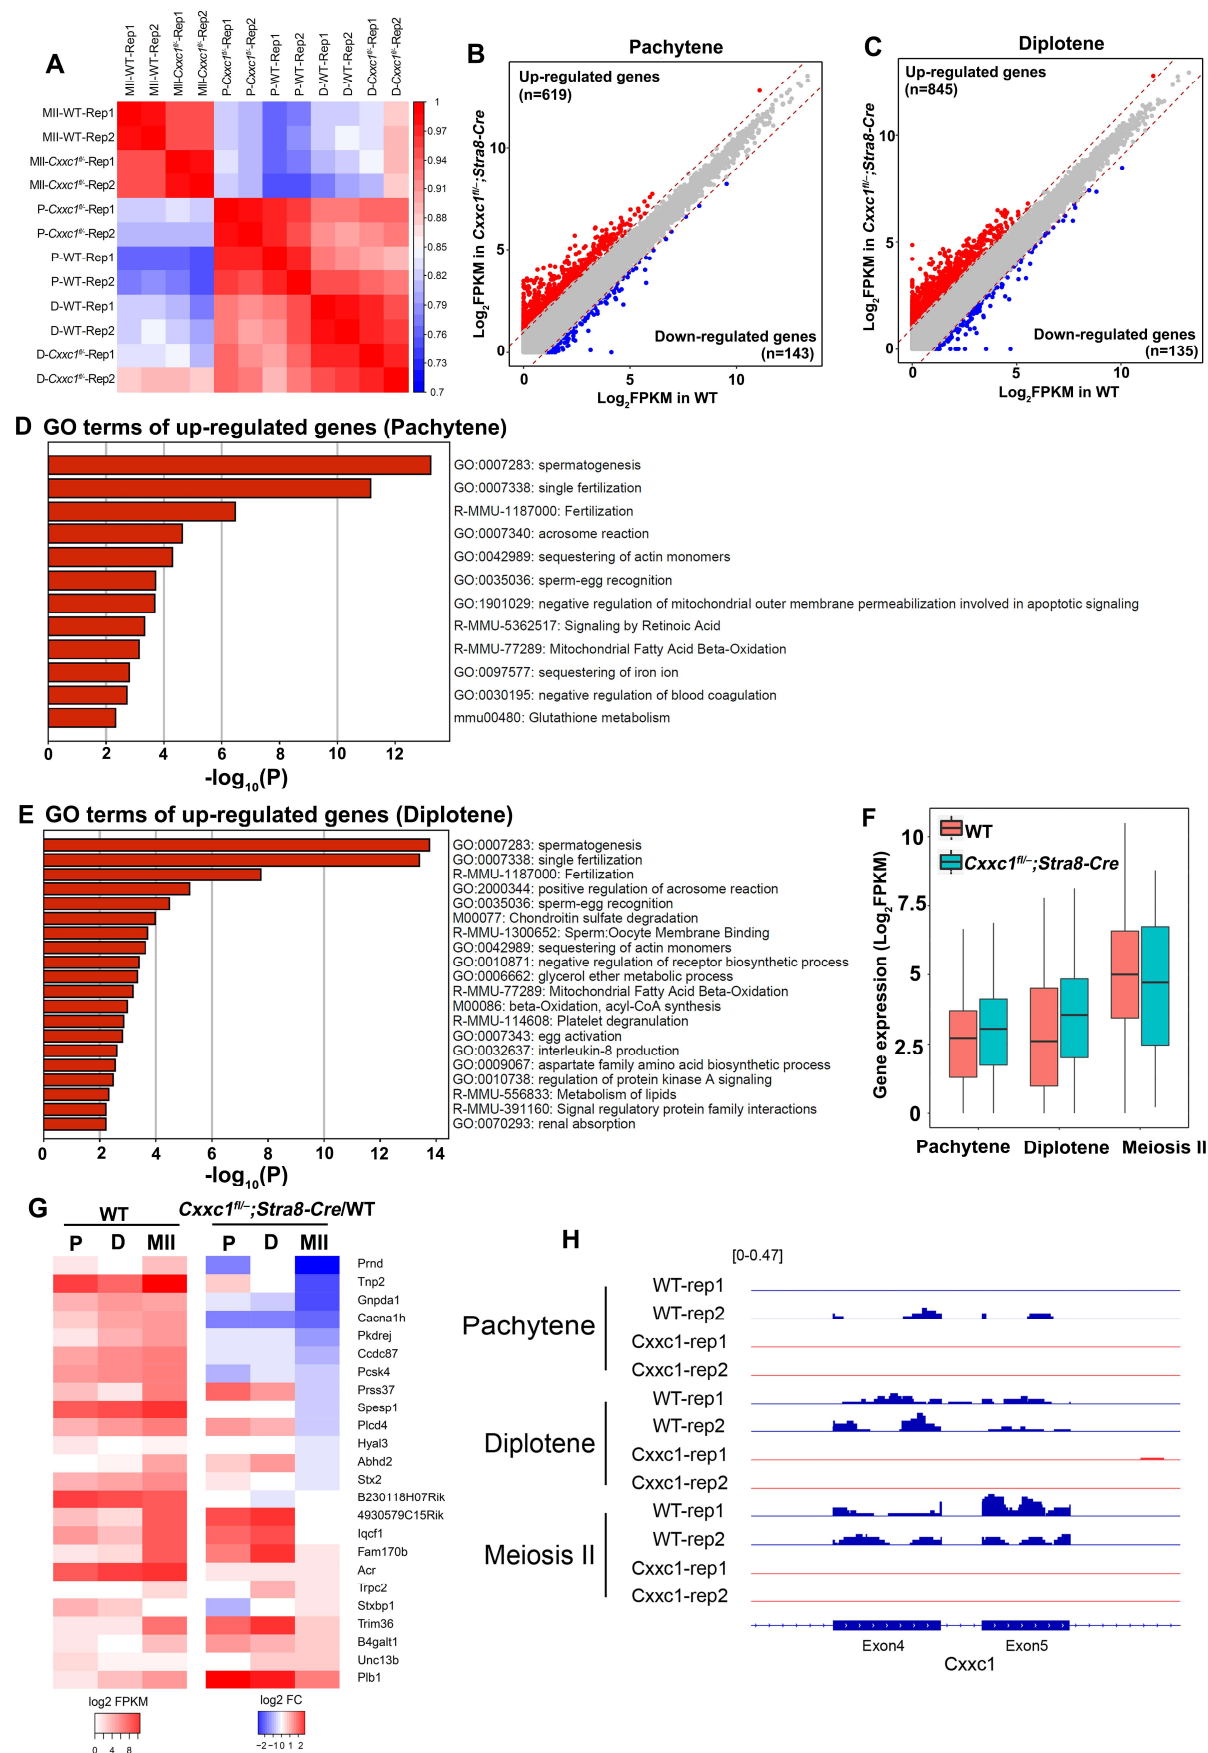

**Figure S2. RNA-seq analyses of pachytene, diplotene and MII spermatocytes derived from WT, *Cxxc1* cKO mice**

**A:** Heatmap of spearman correlation coefficients of total transcripts among WT and *Cxxc1*-null spermatocytes at different stages. **B and C:** Scatter plot comparing transcripts between WT and *Cxxc1* cKO spermatocytes at pachytene (B) and diplotene (C) stages. Genes up-regulated ( $FC > 2.0$ ) and down-regulated ( $FC < 2.0$ ) in *Cxxc1* cKO spermatocytes are colored with red and blue, respectively. **D and E:** Gene ontology analysis of up-regulated genes in *Cxxc1*-null spermatocytes at pachytene (D) and diplotene (E) stages. **F and G:** Box plot and heatmap showing varying gene expressive level of acrosome-reaction genes (GO: 0007340) among WT and *Cxxc1*-null spermatocytes at different stages. **H:** Snapshot of RNA-seq data showing the deletion of *Cxxc1* exons.



**Figure S3**

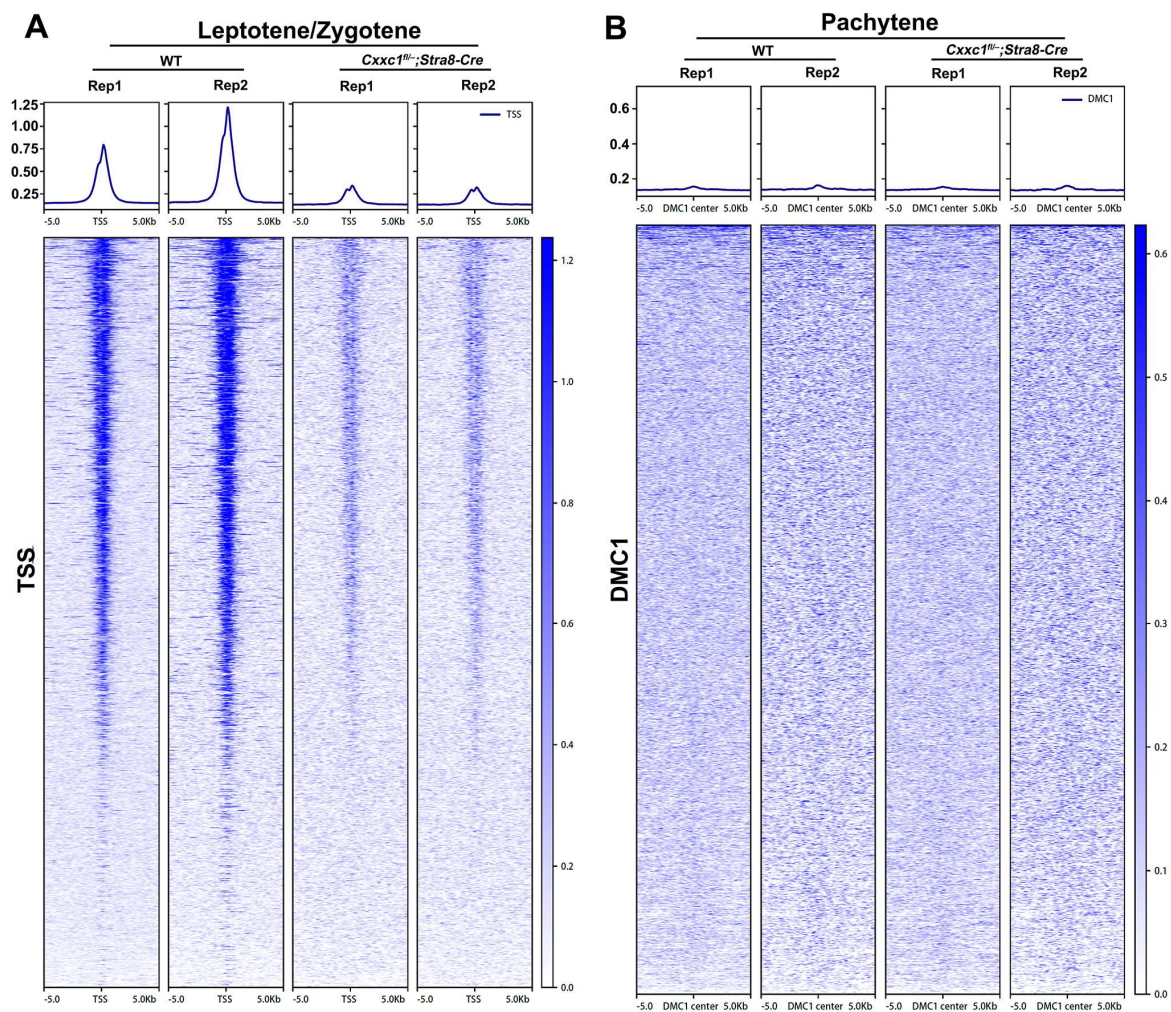

**Figure S3. H3K4me3 ChIP-seq analyses of leptotene/zygotene and pachytene spermatocytes derived from WT, *Cxxc1* cKO mice**

**A:** Heatmap of H3K4me3 levels in WT and *Cxxc1*-null leptotene/zygotene spermatocytes at the TSS regions. **B:** Heatmap of H3K4me3 levels in WT and *Cxxc1*-null pachytene spermatocytes at the centers of DMC1-binding sites.

**Table S1. Antibody information**

| <b>Protein name</b>                | <b>Manufacture (catalogue number)</b> | <b>Applications (working dilution)</b> | <b>Website Link</b>                                                                                                                                                                                                                                                                                                 |
|------------------------------------|---------------------------------------|----------------------------------------|---------------------------------------------------------------------------------------------------------------------------------------------------------------------------------------------------------------------------------------------------------------------------------------------------------------------|
| <b>H3K4me1</b>                     | Cell Signaling (5326)                 | WB (1:1000)                            | <a href="http://www.cst-c.com.cn/products/primary-antibodies/mono-methyl-histone-h3-lys4-d1a9-xp-rabbit-ab/5326?_=1508331672321&amp;Ntt=&amp;tahead=true">http://www.cst-c.com.cn/products/primary-antibodies/mono-methyl-histone-h3-lys4-d1a9-xp-rabbit-ab/5326?_=1508331672321&amp;Ntt=&amp;tahead=true</a>       |
| <b>H3K4me2</b>                     | Cell Signaling (9725)                 | WB (1:1000)                            | <a href="http://www.cst-c.com.cn/products/primary-antibodies/di-methyl-histone-h3-lys4-c64g9-rabbit-mab/9725?_=1508331697704&amp;Ntt=H3K4me&amp;tahead=true">http://www.cst-c.com.cn/products/primary-antibodies/di-methyl-histone-h3-lys4-c64g9-rabbit-mab/9725?_=1508331697704&amp;Ntt=H3K4me&amp;tahead=true</a> |
| <b>H3K4me3</b>                     | Abcam (ab8580)                        | IF (1:400)<br>WB (1:1000)              | <a href="http://www.abcam.com/histone-h3-tri-methyl-k4-antibody-chip-grade-ab8580.html">http://www.abcam.com/histone-h3-tri-methyl-k4-antibody-chip-grade-ab8580.html</a>                                                                                                                                           |
| <b><math>\alpha</math>-Tubulin</b> | Sigma (F2168)                         | WB (1:1000)                            | <a href="http://www.sigmaaldrich.com/catalog/product/sigma/f2168?lang=zh&amp;region=CN">http://www.sigmaaldrich.com/catalog/product/sigma/f2168?lang=zh&amp;region=CN</a>                                                                                                                                           |
| <b>CFP1</b>                        | Abcam (ab198977)                      | WB (1:500);                            | <a href="http://www.abcam.com/cgbp-antibody-epr19199-ab198977.html">http://www.abcam.com/cgbp-antibody-epr19199-ab198977.html</a>                                                                                                                                                                                   |
|                                    |                                       | IF (1:100)                             |                                                                                                                                                                                                                                                                                                                     |
|                                    |                                       | IHC(1:100)                             |                                                                                                                                                                                                                                                                                                                     |
| <b>CFP1-N terminus</b>             | Abcam (ab189829)                      | WB (1:1000)                            | <a href="https://www.abcam.com/CGBP-antibody-N-terminal-ab189829.html?utm_source=labome&amp;utm_medium=paid_referral&amp;utm_term=1RY_CGBP_ab189829">https://www.abcam.com/CGBP-antibody-N-terminal-ab189829.html?utm_source=labome&amp;utm_medium=paid_referral&amp;utm_term=1RY_CGBP_ab189829</a>                 |
| <b>SYCP3</b>                       | Homemade                              | IF (1:400)                             | Immunogen: Full length of mouse SYCP3                                                                                                                                                                                                                                                                               |
| <b>SYCP1</b>                       | Abcam (ab15087)                       | IF (1:200)                             | <a href="https://www.citeab.com/antibodies/771942-ab15087-anti-scp1-antibody">https://www.citeab.com/antibodies/771942-ab15087-anti-scp1-antibody</a>                                                                                                                                                               |
| <b>H2AK119ub1</b>                  | Cell Signaling (8240)                 | WB (1:2000)                            | <a href="https://www.cst-c.com.cn/products/primary-antibodies/ubiquityl-histone-h2a-lys119-d27c4-xp-rabbit-mab/8240?site-search-type=Products">https://www.cst-c.com.cn/products/primary-antibodies/ubiquityl-histone-h2a-lys119-d27c4-xp-rabbit-mab/8240?site-search-type=Products</a>                             |
| <b>H3K27me3</b>                    | Abcam (ab9733)                        | WB (1:1000)                            | <a href="https://www.cst-c.com.cn/products/primary-antibodies/tri-methyl-histone-h3-lys27-c36b11-rabbit-mab/9733?site-search-type=Products">https://www.cst-c.com.cn/products/primary-antibodies/tri-methyl-histone-h3-lys27-c36b11-rabbit-mab/9733?site-search-type=Products</a>                                   |
| <b>MVH</b>                         | Abcam (ab13840)                       | IF (1: 200);<br>IHC (1: 400)           | <a href="http://www.abcam.com/ddx4--mvhantibody-ab13840.html">http://www.abcam.com/ddx4--mvhantibody-ab13840.html</a>                                                                                                                                                                                               |

|                                |                                                          |             |                                                                                                                                                                                                                                                                                                                     |
|--------------------------------|----------------------------------------------------------|-------------|---------------------------------------------------------------------------------------------------------------------------------------------------------------------------------------------------------------------------------------------------------------------------------------------------------------------|
| <b><math>\gamma</math>H2AX</b> | Cell Signaling<br>(9718S)                                | IF (1: 400) | <a href="https://www.cellsignal.com/products/primary-antibodies/phospho-histone-h2a-xser139-20e3-rabbitmab/9718?N=4294956287&amp;Ntt=h2a.x&amp;fromPage=plp">https://www.cellsignal.com/products/primary-antibodies/phospho-histone-h2a-xser139-20e3-rabbitmab/9718?N=4294956287&amp;Ntt=h2a.x&amp;fromPage=plp</a> |
| <b>MLH1</b>                    | Proteintech<br>(11697-1-AP)                              | IF (1: 100) | <a href="https://www.ptglab.com/products/MLH1-Antibody-11697-1-AP.htm">https://www.ptglab.com/products/MLH1-Antibody-11697-1-AP.htm</a>                                                                                                                                                                             |
| <b>CREST</b>                   | Fitzgerald<br>Industries<br>International<br>(70R-21494) | IF (1:100)  | <a href="https://www.fitzgerald-fii.com/crest-antibody-70r-21494.html">https://www.fitzgerald-fii.com/crest-antibody-70r-21494.html</a>                                                                                                                                                                             |
| <b>DMC1</b>                    | Proteintech<br>(13714-1-AP)                              | IF (1: 100) | <a href="https://www.ptglab.com/Products/DMC1-Antibody-13714-1-AP.htm">https://www.ptglab.com/Products/DMC1-Antibody-13714-1-AP.htm</a>                                                                                                                                                                             |
| <b>Rad51</b>                   | Abcam<br>(ab176458)                                      | IF (1: 100) | <a href="http://www.abcam.com/rpa70-antibodyab87272.html">http://www.abcam.com/rpa70-antibodyab87272.html</a>                                                                                                                                                                                                       |
| <b>PNA</b>                     | Sigma<br>(L7381)                                         | IF (1: 500) | <a href="https://www.sigmaaldrich.com/catalog/product/sigma/l7381?lang=zh&amp;region=CN">https://www.sigmaaldrich.com/catalog/product/sigma/l7381?lang=zh&amp;region=CN</a>                                                                                                                                         |
| <b>Lin28a</b>                  | R&D Systems                                              | IF (1: 200) | <a href="https://www.rndsystems.com/cn/products/human-lin-28a-antibody_af3757">https://www.rndsystems.com/cn/products/human-lin-28a-antibody_af3757</a>                                                                                                                                                             |

**Table S2. Summary of sequencing information**

| Type     | Sample                                 | Total reads | Mapping efficiency | Uniquely mapping efficiency | Correlation |
|----------|----------------------------------------|-------------|--------------------|-----------------------------|-------------|
| RNA-seq  | P-WT-Rep1                              | 16,984,226  | 88.41%             | 78.72%                      | 0.965       |
|          | P-WT-Rep2                              | 20,610,839  | 88.12%             | 81.88%                      |             |
|          | P- <i>Cxxc</i> <sup>fl/-</sup> -Rep1   | 16,179,726  | 90.22%             | 82.18%                      | 0.980       |
|          | P- <i>Cxxc</i> <sup>fl/-</sup> -Rep2   | 22,555,557  | 86.69%             | 78.11%                      |             |
|          | D-WT-Rep1                              | 20,124,165  | 92.72%             | 86.80%                      | 0.978       |
|          | D-WT-Rep2                              | 21,454,127  | 89.78%             | 84.51%                      |             |
|          | D- <i>Cxxc</i> <sup>fl/-</sup> -Rep1   | 20,723,889  | 93.36%             | 87.26%                      | 0.971       |
|          | D- <i>Cxxc</i> <sup>fl/-</sup> -Rep2   | 19,643,176  | 91.66%             | 85.87%                      |             |
|          | MII-WT-Rep1                            | 19,902,160  | 91.86%             | 86.38%                      | 0.980       |
|          | MII-WT-Rep2                            | 20,810,855  | 90.34%             | 85.60%                      |             |
|          | MII- <i>Cxxc</i> <sup>fl/-</sup> -Rep1 | 19,101,599  | 92.93%             | 87.52%                      | 0.978       |
|          | MII- <i>Cxxc</i> <sup>fl/-</sup> -Rep2 | 17,072,060  | 91.80%             | 85.57%                      |             |
| ChIP-seq | L/Z-WT-Rep1                            | 27,322,505  | 94.73%             | 67.77%                      | 0.94        |
|          | L/Z-WT-Rep2                            | 14,196,091  | 94.17%             | 69.14%                      |             |
|          | L/Z- <i>Cxxc</i> <sup>fl/-</sup> -Rep1 | 13,905,388  | 85.25%             | 61.81%                      | 0.97        |
|          | L/Z- <i>Cxxc</i> <sup>fl/-</sup> -Rep2 | 14,497,563  | 93.52%             | 67.58%                      |             |
|          | P-WT-Rep1                              | 26,641,654  | 96.38%             | 66.95%                      | 0.91        |
|          | P-WT-Rep2                              | 11,196,777  | 94.27%             | 67.16%                      |             |
|          | P- <i>Cxxc</i> <sup>fl/-</sup> -Rep1   | 24,615,804  | 96.32%             | 65.40%                      | 0.89        |
|          | P- <i>Cxxc</i> <sup>fl/-</sup> -Rep2   | 11,252,776  | 91.04%             | 64.83%                      |             |
